# Supplementary material
Source: HighWire-hosted journal article supplement (https://bmjopen.bmj.com/content/10/11/e040034)
Supplement: inline-supplementary-material-1 [file inline-supplementary-material-1.pdf]

**Table S1** Crude and adjusted hazard ratios (95% confidence interval) for stroke and ischemic heart disease in the nephrolithiasis and control groups considering a 1-year washout period (n = 84,605)

| Characteristics        | Hazard ratios    |         |                  |         |
|------------------------|------------------|---------|------------------|---------|
|                        | Crude†           | P-value | Adjusted†‡       | P-value |
| Stroke                 |                  |         |                  |         |
| Nephrolithiasis        | 1.15 (1.08-1.22) | <0.001* | 1.14 (1.07-1.21) | <0.001* |
| Control                | 1.00             |         | 1.00             |         |
| Ischemic heart disease |                  |         |                  |         |
| Nephrolithiasis        | 1.28 (1.21-1.36) | <0.001* | 1.23 (1.16-1.31) | <0.001* |
| Control                | 1.00             |         | 1.00             |         |

\* Cox proportional hazard regression model, significance at  $P < 0.05$

† Models stratified by age, sex, income, and region of residence.

‡ Adjusted for obesity, smoking, alcohol consumption, fasting blood glucose, total cholesterol, and CCI scores.
