# Supplementary material
Source: HighWire-hosted journal article supplement (https://bmjopen.bmj.com/content/10/11/e040034)
Supplement: inline-supplementary-material-9 [file inline-supplementary-material-9.pdf]

**Table S2** Crude and adjusted hazard ratios (95% confidence interval) for stroke and ischemic heart disease in the nephrolithiasis and control groups considering a 2-year washout period (n = 74,400)

| Characteristics        | Hazard ratios    |         |                  |         |
|------------------------|------------------|---------|------------------|---------|
|                        | Crude†           | P-value | Adjusted†‡       | P-value |
| Stroke                 |                  |         |                  |         |
| Nephrolithiasis        | 1.19 (1.12-1.25) | <0.001* | 1.18 (1.11-1.24) | <0.001* |
| Control                | 1.00             |         | 1.00             |         |
| Ischemic heart disease |                  |         |                  |         |
| Nephrolithiasis        | 1.29 (1.23-1.36) | <0.001* | 1.24 (1.18-1.31) | <0.001* |
| Control                | 1.00             |         | 1.00             |         |

\* Cox proportional hazard regression model, significance at  $P < 0.05$

† Models stratified by age, sex, income, and region of residence.

‡ Adjusted for obesity, smoking, alcohol consumption, fasting blood glucose, total cholesterol, and CCI scores.
